# Supplementary material for: Solution-processed metal doping of sub-3 nm SnO2 quantum wires for enhanced H2S sensing at low temperature
Source: Royal Society of Chemistry journal article supplement (doi:10.1039/d2ta03012h), 2022-01-01
Supplement: d2ta03012h1.pdf [file d2ta03012h1.pdf]

## Electronic Supplementary Information

### Solution-Processed Metal Doping of Sub-3 nm SnO<sub>2</sub> Quantum Wires for Enhanced H<sub>2</sub>S Sensing at Low Temperature

Jia Yan,<sup>a</sup> Xuyun Guo,<sup>b</sup> Ye Zhu,<sup>b,c</sup> Zhilong Song,<sup>d,\*</sup> and Lawrence Yoon Suk Lee<sup>a,c,\*</sup>

<sup>a</sup> Department of Applied Biology and Chemical Technology, The Hong Kong Polytechnic University, Hung Hom, Kowloon, Hong Kong SAR, China.

E-mail: lawrence.ys.lee@polyu.edu.hk (L. Y. S. Lee)

<sup>b</sup> Department of Applied Physics, The Hong Kong Polytechnic University, Hung Hom, Kowloon, Hong Kong SAR, China.

<sup>c</sup> Research Institute for Smart Energy, The Hong Kong Polytechnic University, Hung Hom, Kowloon, Hong Kong SAR, China.

<sup>d</sup> Institute for Energy Research, Jiangsu University, Zhenjiang, Jiangsu, 212013, China.

E-mail: songzl@ujs.edu.cn (Z. Song)

**Keywords:** tin oxide; gas sensor; quantum wire; oxygen vacancy; metal atom doping

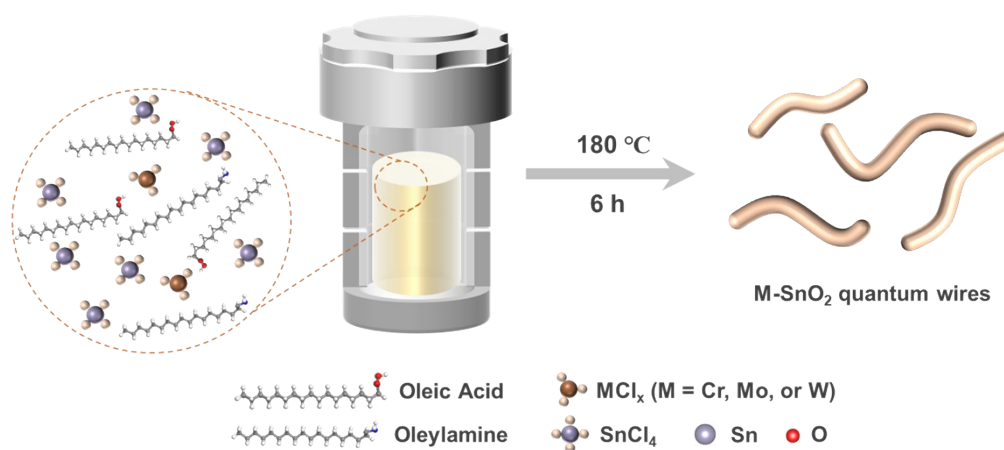

**Fig.S1** Schematic diagram of the synthesis of metal-doped SnO<sub>2</sub> (M-SnO<sub>2</sub>) quantum wires.

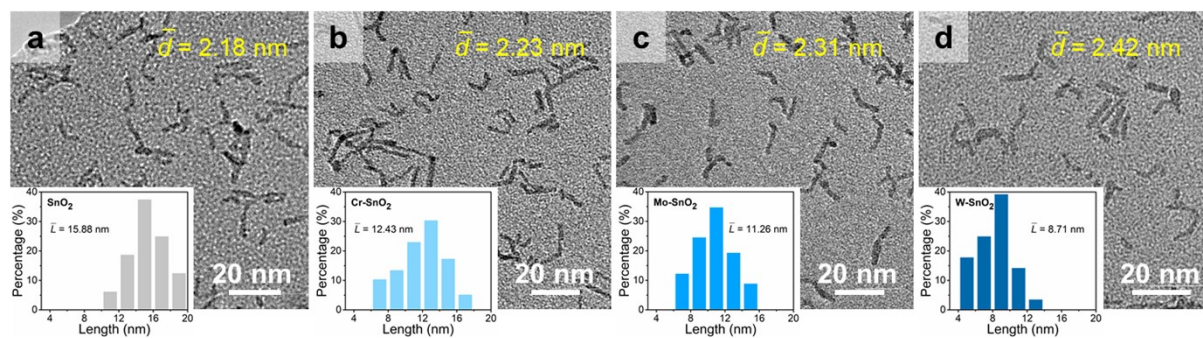

**Fig. S2** TEM images of a) SnO<sub>2</sub>, b) Cr-SnO<sub>2</sub>, c) Mo-SnO<sub>2</sub>, and d) W-SnO<sub>2</sub>. Insets are histograms showing the distribution of length.

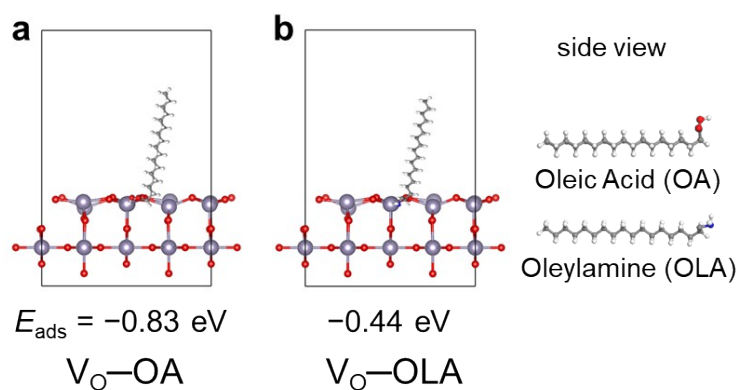

**Fig. S3** Side view of model cell structure for DFT calculations of a) OA and b) OLA adsorption energy ( $E_{\text{ads}}$ ) on SnO<sub>2</sub> (110) facets.

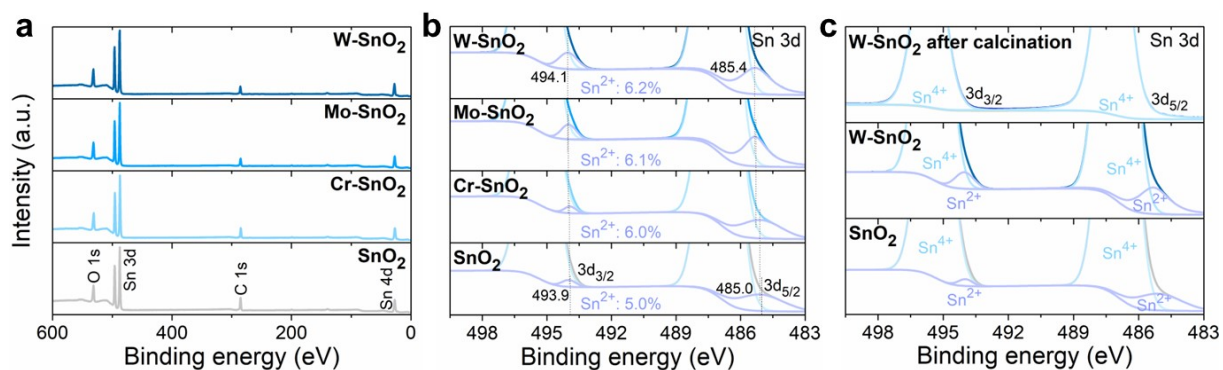

**Fig. S4** a) XPS survey spectra and high-resolution Sn 3d spectra (enlarged Sn<sup>2+</sup> peak area) of SnO<sub>2</sub>, Cr-SnO<sub>2</sub>, Mo-SnO<sub>2</sub>, and W-SnO<sub>2</sub> b) before and c) after the heating treatment at 550 °C in air for 12 h.

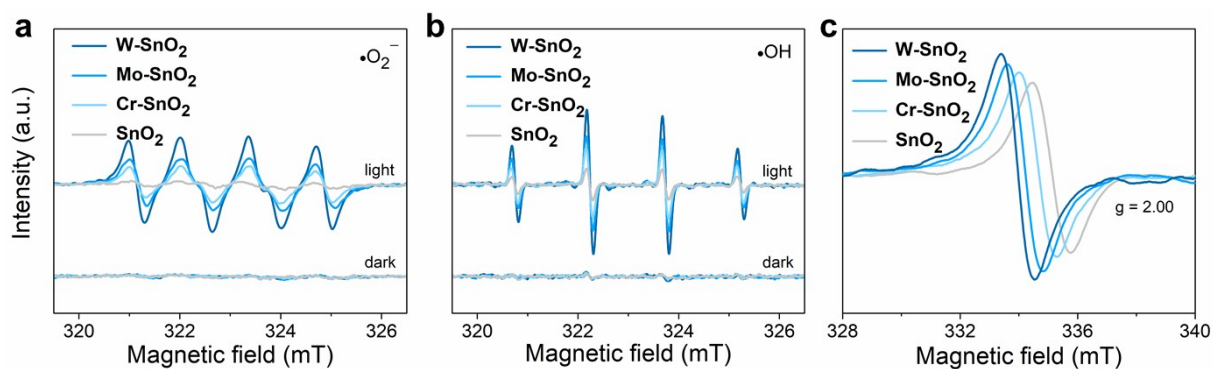

**Fig. S5** ESR spectra of a) DMPO-•OH and b) DMPO-•O<sub>2</sub><sup>-</sup> in aqueous and methanol dispersion of SnO<sub>2</sub>, Cr-SnO<sub>2</sub>, Mo-SnO<sub>2</sub>, and W-SnO<sub>2</sub>, respectively. c) EPR spectra of SnO<sub>2</sub>, Cr-SnO<sub>2</sub>, Mo-SnO<sub>2</sub>, and W-SnO<sub>2</sub>.

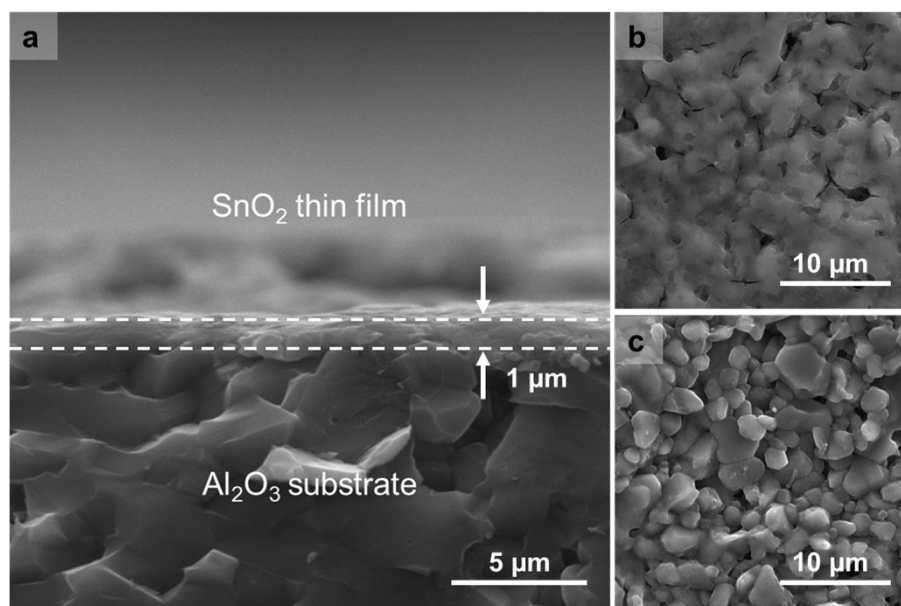

**Fig. S6** a) Cross-sectional and b) top-view SEM images of SnO<sub>2</sub> thin film on Al<sub>2</sub>O<sub>3</sub> ceramic substrate. c) SEM image of Al<sub>2</sub>O<sub>3</sub> ceramic substrate.

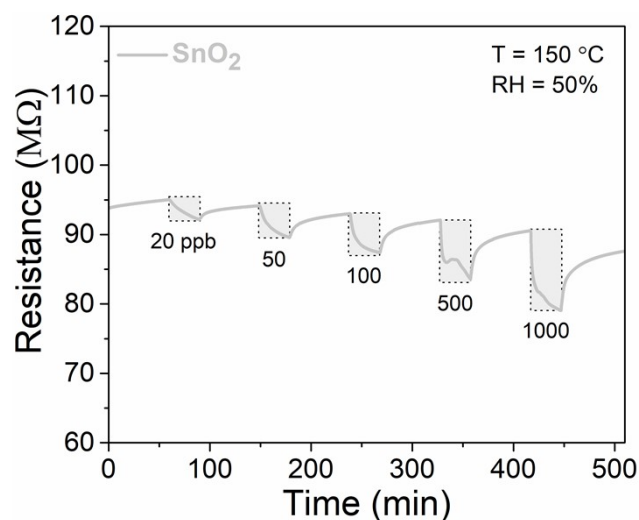

**Fig. S7** A typical H<sub>2</sub>S sensing curve of SnO<sub>2</sub> from 20 to 1,000 ppb H<sub>2</sub>S at the optimized operation temperature (150 °C).

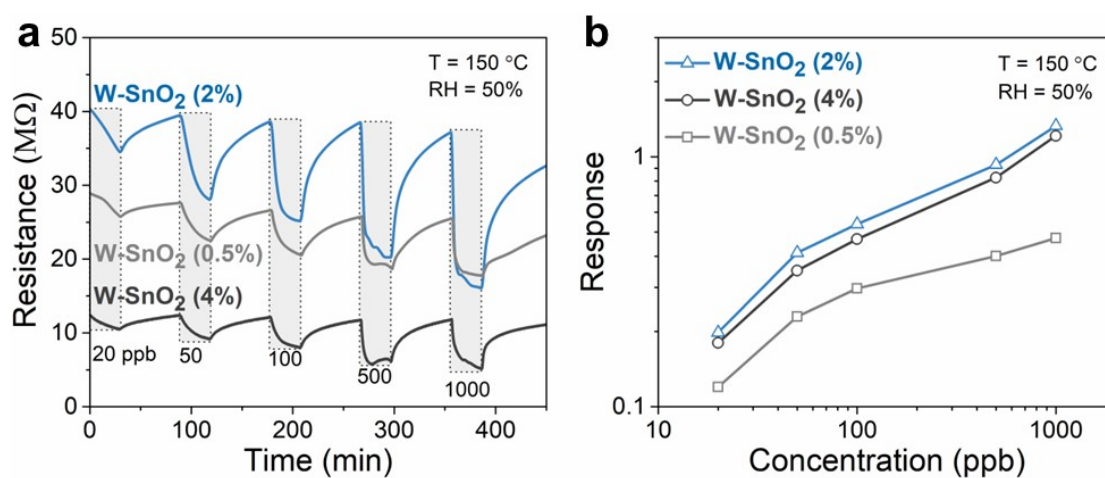

**Fig. S8** Gas-sensing curves and the corresponding response toward H<sub>2</sub>S of W-SnO<sub>2</sub>-based sensors prepared with different W doping contents.

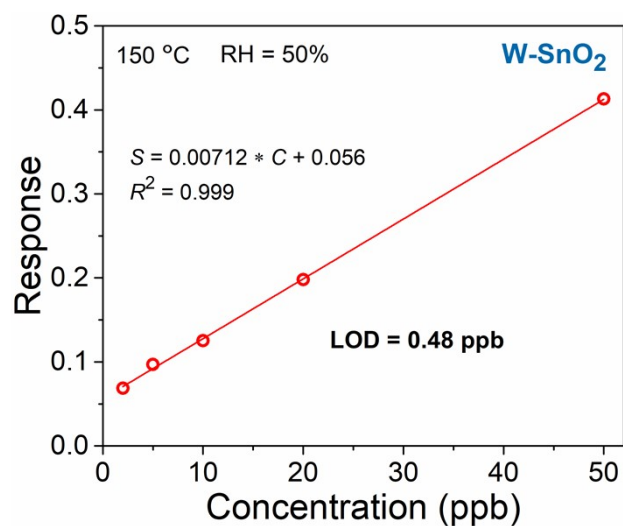

Fig. S9 A plot of sensor response against the concentration of H<sub>2</sub>S.

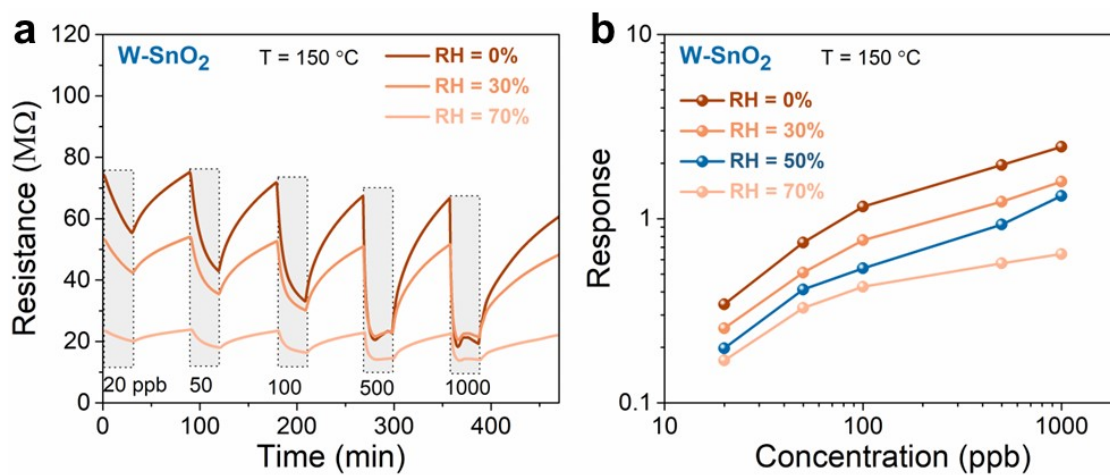

Fig. S10 Effect of humidity on the sensing performance of W-SnO<sub>2</sub>-based gas sensor: a) Gas-sensing curve and b) sensing response.

**Table S1** Molar ratio of doped metal in SnO<sub>2</sub> (M/Sn) obtained by STEM–EDS mapping.

|                     | Cr-SnO <sub>2</sub> | Mo-SnO <sub>2</sub> | W-SnO <sub>2</sub> |
|---------------------|---------------------|---------------------|--------------------|
| molar ratio of M/Sn | 1.71 at.%           | 1.79 at.%           | 2.03 at.%          |

**Table S2** Comparison of H<sub>2</sub>S gas sensor performances at low temperatures.

| Sample                                                | Temperature (°C) | H <sub>2</sub> S Concentration (ppm) | Response <sup>a</sup> | LOD <sup>b</sup> (ppb) | Ref.             |
|-------------------------------------------------------|------------------|--------------------------------------|-----------------------|------------------------|------------------|
| W-SnO <sub>2</sub> QWs <sup>c</sup>                   | 150              | 0.001                                | 0.038                 | 0.48                   | <b>This work</b> |
|                                                       |                  | 0.1                                  | 0.538                 |                        |                  |
|                                                       |                  | 1.0                                  | 1.330                 |                        |                  |
| La/ZnO                                                | 150              | 5.0                                  | 175.3                 | 50.0                   | 1                |
| CuO/NiO nanowall                                      | 133              | 5.0                                  | 35.9                  | 0.5                    | 2                |
| WO <sub>3</sub> QDs <sup>d</sup>                      | 80               | 10.0                                 | 6.0                   | 56.0                   | 3                |
| BiVO <sub>4</sub>                                     | 75               | 5.0                                  | 3.9                   | 62.5                   | 4                |
| In <sub>2</sub> O <sub>3</sub> QDs <sup>d</sup>       | 37               | 0.5                                  | 3.4                   | 4.4                    | 5                |
| SnO <sub>2</sub> /rGO <sup>e</sup> /PANI <sup>f</sup> | RT <sup>g</sup>  | 5.0                                  | 3.2                   | 50.0                   | 6                |
| CuO/TiO <sub>2</sub>                                  | RT <sup>g</sup>  | 100                                  | 0.88                  | 3000                   | 7                |
| WO <sub>3</sub> -Bi <sub>2</sub> WO <sub>6</sub>      | RT <sup>g</sup>  | 0.05                                 | 3.4                   | 2                      | 8                |
| Cu-doped In <sub>2</sub> O <sub>3</sub>               | 250              | 50                                   | 340.7                 | 1000                   | 9                |

<sup>a</sup> Response =  $R_a/R_g - 1$ ; <sup>b</sup> LOD = limit of detections; <sup>c</sup> QWs = quantum wires; <sup>d</sup> QDs = quantum dots; <sup>e</sup> rGO = reduced graphene oxide; <sup>f</sup> PANI = polyaniline; <sup>g</sup> RT = room temperature

**Table S3** Properties of the interfering gas molecules.<sup>10, 11</sup>

| Gas                                      | H <sub>2</sub> S | CH <sub>4</sub>    | CO     | H <sub>2</sub> | toluene                                         | FA <sup>a</sup> |
|------------------------------------------|------------------|--------------------|--------|----------------|-------------------------------------------------|-----------------|
| <b>Broken bond</b>                       | HS–H             | CH <sub>3</sub> –H | C–O    | H–H            | CH <sub>3</sub> –OC <sub>6</sub> H <sub>5</sub> | H–CHO           |
| <b>Bond energy (kJ mol<sup>-1</sup>)</b> | 381.0            | 431.0              | 1076.5 | 436.0          | 273.2                                           | 368.40          |

<sup>a</sup> FA = formaldehyde

## References

1. Y. Zhang, C. Wang, L. Zhao, F. Liu, X. Sun, X. Hu and G. Lu, *Sens. Actuators B Chem.*, 2021, **334**, 129514.
2. L. Sui, T. Yu, D. Zhao, X. Cheng, X. Zhang, P. Wang, Y. Xu, S. Gao, H. Zhao, Y. Gao and L. Huo, *J. Hazard. Mater.*, 2020, **385**, 121570.
3. H. Yu, Z. Song, Q. Liu, X. Ji, J. Liu, S. Xu, H. Kan, B. Zhang, J. Liu, J. Jiang, L. Miao and H. Liu, *Sens. Actuators B Chem.*, 2017, **248**, 1029-1036.
4. C. Li, X. Qiao, J. Jian, F. Feng, H. Wang and L. Jia, *Chem. Eng. J.*, 2019, **375**, 121924.
5. S. Yang, Z. Song, N. Gao, Z. Hu, L. Zhou, J. Liu, B. Zhang, G. Zhang, S. Jiang, H.-Y. Li and H. Liu, *Sens. Actuators B Chem.*, 2019, **286**, 22-31.
6. D. Zhang, Z. Wu and X. Zong, *Sens. Actuators B Chem.*, 2019, **289**, 32-41.
7. H. He, C. Zhao, J. Xu, K. Qu, Z. Jiang, Z. Gao and Y. Y. Song, *ACS Sens.*, 2021, **6**, 3387-3397.
8. C. Zhang, K. Wu, H. Liao and M. Debliquy, *Chem. Eng. J.*, 2022, **430**, 132813.
9. Y. Zhang, S. Han, M. Wang, S. Liu, G. Liu, X. Meng, Z. Xu, M. Wang and G. Qiao, *J. Adv. Ceram.*, 2022, **11**, 427-442.
10. Z. S. Hosseini, A. I. zad and A. Mortezaali, *Sens. Actuators B Chem.*, 2015, **207**, 865-871.
11. Y.-R. Luo, *Handbook of bond dissociation energies in organic compounds*, CRC Press, Boca Raton London New York Washington, D.C., 2002.
